# Supplementary material
Source: PubMed Central journal article supplement (PMC6397673)
Supplement: NIHMS1009836-supplement-Suppl.pdf [file NIHMS1009836-supplement-Suppl.pdf]

## **Supplementary Data**

### **Hepatic Carboxylesterases are Differentially Regulated in PPAR $\alpha$ -Null Mice Treated with Perfluorooctanoic Acid**

Xia Wen, Angela A. Baker, Curtis D. Klaassen, J. Christopher Corton,  
Jason R. Richardson, Lauren M. Aleksunes

**Supplementary Figure 1. Body weight and liver weight of WT, PPAR $\alpha$ -null, and PFOA-treated WT and PPAR $\alpha$ -null mice.**

**Supplementary Figure 2. mRNA levels of transcription factors and their target genes in PFOA-treated WT and PPAR $\alpha$ -null mice.**

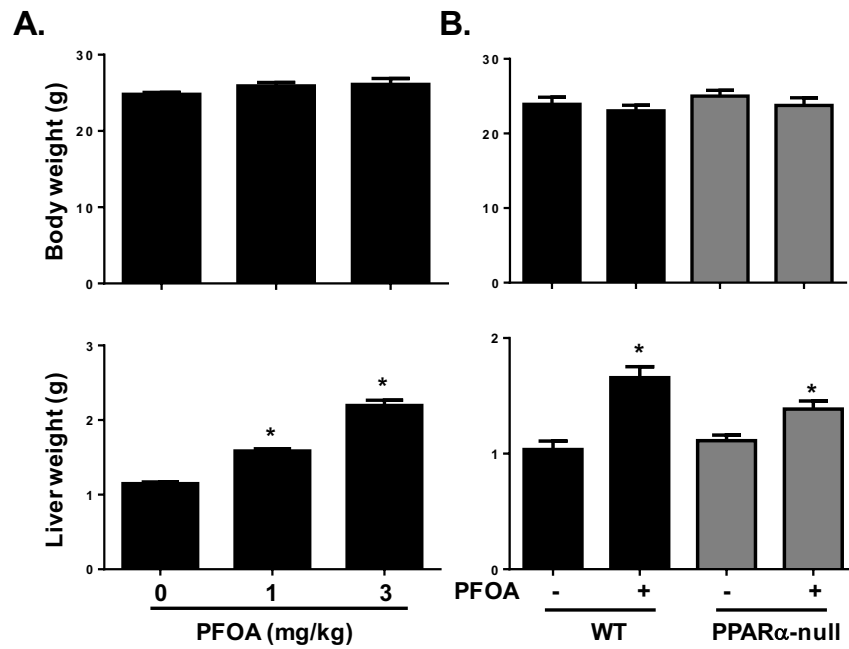

**Supplementary Figure 1. Body weight and liver weight of WT, PPAR $\alpha$ -null, and PFOA-treated WT and PPAR $\alpha$ -null mice.** WT and PPAR $\alpha$ -null mice were treated with PFOA (1 or 3 mg/kg, 7 days, po) and livers were collected. Data are presented as mean  $\pm$  SE (n = 4-6 mice). Asterisks (\*) represent statistically significant differences ( $p < 0.05$ ) compared to vehicle-treated WT or PPAR $\alpha$ -null mice.

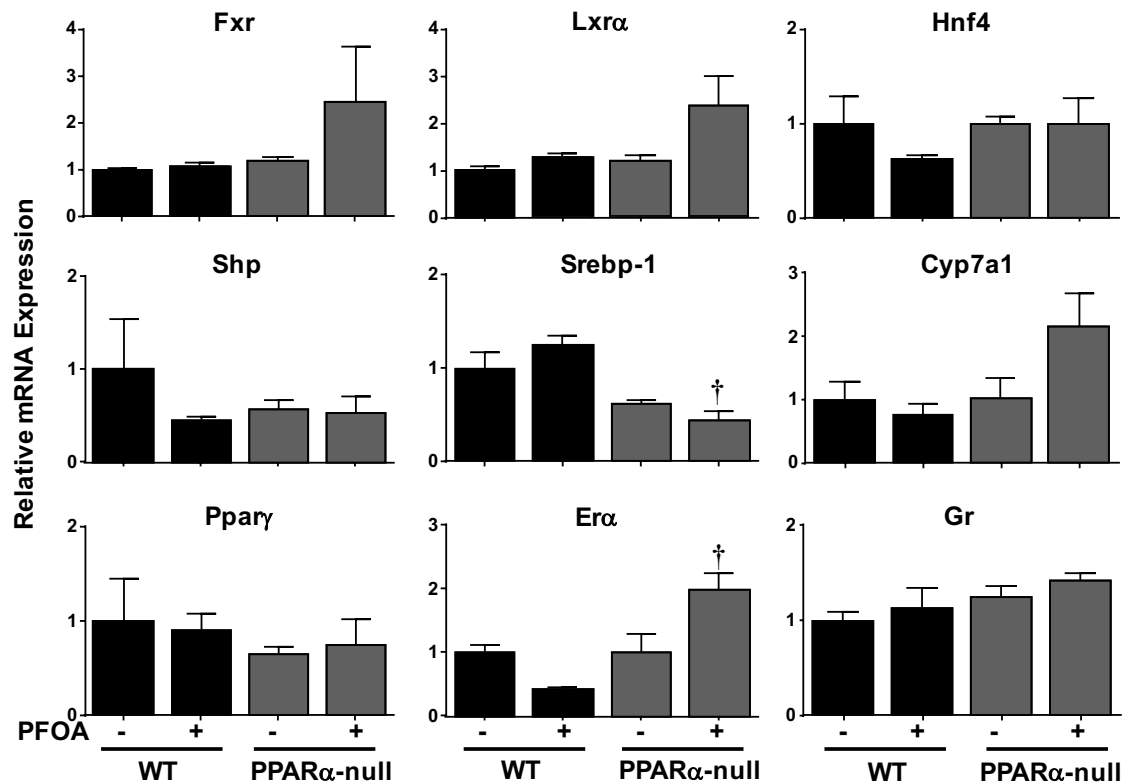

**Supplementary Figure 2. mRNA levels of transcription factors and their target genes in PFOA-treated WT and PPAR $\alpha$ -null mice.** WT and PPAR $\alpha$ -null mice were treated with PFOA (3 mg/kg, 7 days, po) and livers were collected. Messenger RNA expression of *Fxr*, *Shp*, *LXR $\alpha$* , *Srebp-1*, *Hnf4*, *Cyp7a1*, *PPAR $\gamma$* , *Era* and *Gr* was quantified by qPCR assay and normalized to the housekeeping gene,  *$\beta$ -actin*. Data are presented as mean  $\pm$  SE (n = 4-6 mice). Daggers (†) represent statistically significant differences (p < 0.05) compared to PFOA-treated WT mice.
